# Supplementary material for: Transcriptome and flavonoid metabolome analysis reveals the molecular basis of floral color divergence between the hybrid and their parental species in Paphiopedilum
Source: Research Square preprint supplement (doi:10.21203/rs.3.rs-6878590/v1), 2025-07-17
Supplement: Supplementary file 1 [file 215c72f5b1656743574e72dd.xlsx]

## Sheet: Sheet1
Abbreviations
RHS	Royal Horticultural Society
P. delenatii /Pd	Paphiopedilum delenatii
P. primulinum/Pp	Paphiopedilum primulinum
DEGs	Differentially expressed genes
KEGG	Kyoto Encyclopedia of Genes and Genomes
NR	NCBI non-redundant protein sequences
CITES	Convention on International Trade in Endangered Species of Wild Fauna and Flora
CHS	Chalcone synthase
PAL	Phenylalanine ammonia-lyase
C4H	Cinnamate 4-hydroxylase
4CL	4-coumarate-CoA ligase
CHI	Chalcone isomerase
DFR	Dihydroflavonol 4-reductase
ANS	Anthocyanidin synthase
FLS	Flavonol synthase
F3'H	Flavonoid 3'-hydroxylase
F3'5'H	Flavonoid 3',5'-hydroxylase
IFS	Isoflavone synthase
FNS	Flavone synthase
KOG	Clusters of orthologous groups for eukaryotic complete genomes
GO	Gene Ontology
NT	NCBI nucleotide sequences
PFAM	Protein family
NIBC	The National Center for Biotechnology Information
WGD	Whole-genome duplication
Mya	Million years ago
LC-MS	Liquid chromatography-mass spectrometry
BUSCO	Benchmarking Universal Single-Copy Orthologs
ORFs	Open reading frames
CDS	Coding sequences
RSEM	RNA-Seq by Expectation-Maximization
DESeq2	Differential Expression analysis for Sequence data 2
PPI analysis	Protein-Protein Interaction analysis
STRING	Search Tool for the Retrieval of Interacting Genes
